# Supplementary material
Source: Springer Nature journal article supplement (https://www.springermedizin.de/resource/supplementary/13023_2013_758_MOESM1_ESM.pdf/9642976)
Supplement: MOESM1 [file 9642976]

SOLiD4 RAW DATA

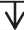

12.179 variants

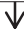

Filter1: variants which fulfill these 4 conditions

- 1- placed in exonic or splicing regions
- 2- NRA frequency  $\leq 0.01$  en 1000g2012 database
- 3- %NRA  $\leq 4$  in our study group
- 4- functional significance (indels, stopgain, splicing, missense)

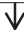

219 variants

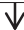

Filter2: variants which fulfill 3 of these 4 conditions:

- 1- coverage  $\geq 20$
- 2- %NRA  $\geq 30$
- 3- MQV  $\geq 15$  for both alleles
- 4- (reference MQV - variant MQV)  $\leq 5$

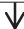

77 variants

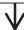

SANGER  
confirmation
